# Supplementary material for: Valorization of Agro-Wastes as Fillers in PLA-Based Biocomposites for Increasing Sustainability in Fused Deposition Modeling Additive Manufacturing
Source: MDPI journal article supplement (doi:10.3390/ma17061421), 2024-03-20
Supplement: s1 [file s1]

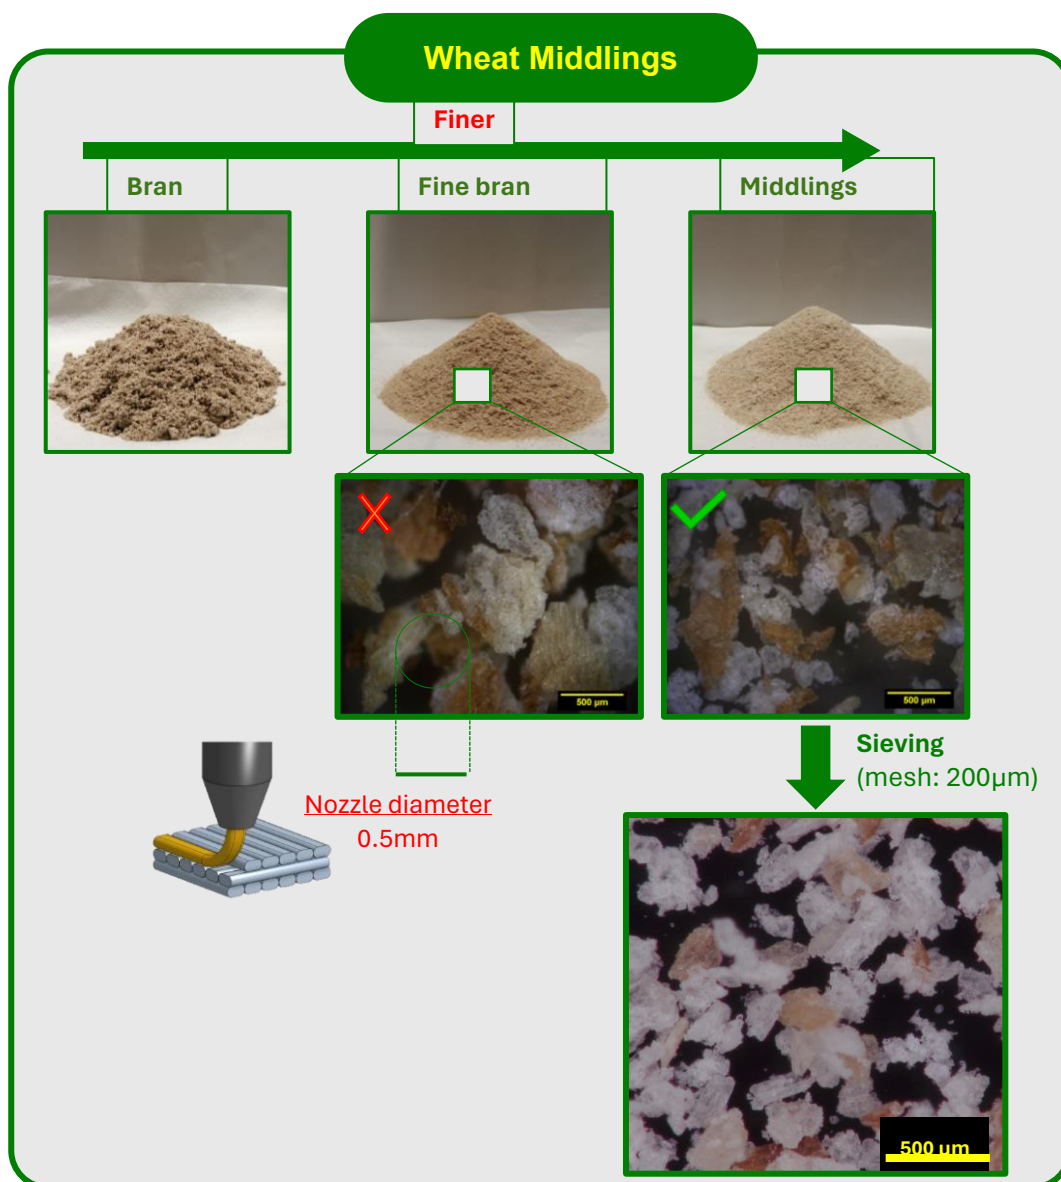

**Figure S1.** Different particles in the different fractions of wheat middlings.

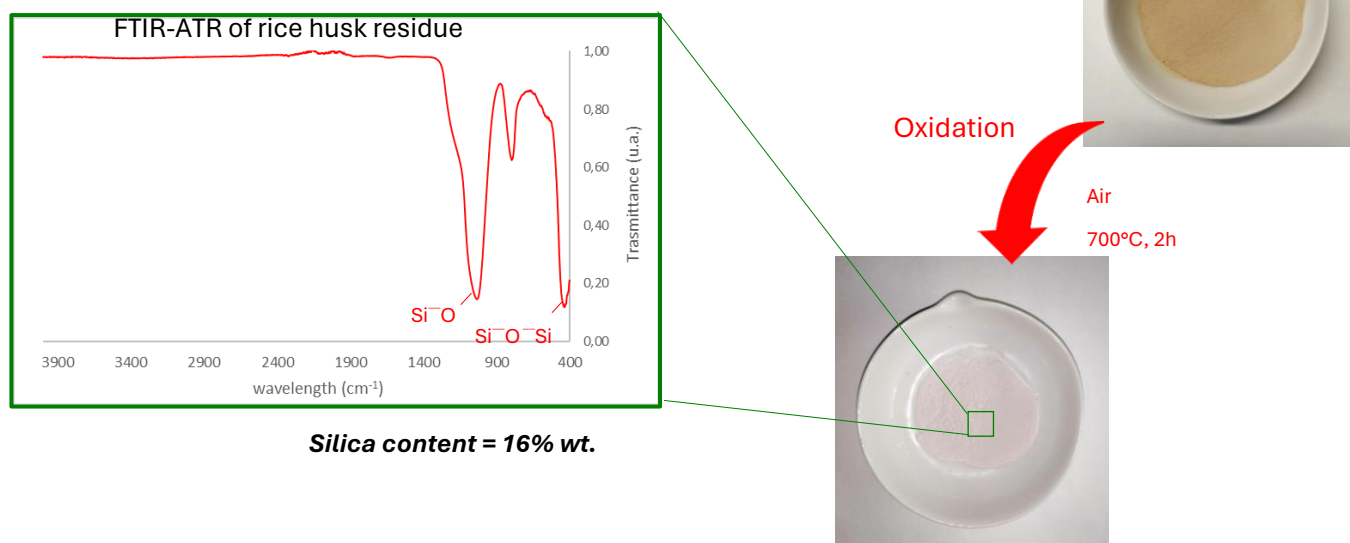

**Figure S2.** Photographs of the Rice Husk before and after removal of the organic fraction, together with the FT-IR Spectrum of the white solid residue which is typical of Silica.
